# Supplementary material for: Cyanate ester composites containing surface functionalized BN particles with grafted hyperpolyarylamide exhibiting desirable thermal conductivities and a low dielectric constant
Source: Royal Society of Chemistry journal article supplement (doi:10.1039/c9ra06753a), 2019-01-01
Supplement: c9ra06753a1.pdf [file c9ra06753a1.pdf]

### Support Information

1. This experiment results was used as comparative experiments to illustrate the contribution of interfacial performance to improved thermal conductivity, and which was added as Table S1 in support information.

Table S1. Thermal conductivity, thermal diffusivity and specific heat of BN/CE composites

| Sample   | Thermal               | Thermal                          | Specific     |
|----------|-----------------------|----------------------------------|--------------|
|          | conductivity/W(m*K)-1 | diffusivity/(mm <sup>2</sup> /s) | heat/(J/g/K) |
| CE       | 0.197                 | 0.134                            | 1.218        |
| BN15 /CE | 0.358                 | 0.249                            | 1.136        |
| BN25/CE  | 0.637                 | 0.453                            | 1.053        |
| BN38/CE  | 1.072                 | 0.747                            | 0.991        |

2. Dielectric constant of the BN-HBP/CE composites at different frequencies is added as table S2 in Support Information.

Table S2. Dielectric constant of the BN-HBP/CE composites at different frequencies

| Sample      | Frequency/Hz    |                 |                 |                 |
|-------------|-----------------|-----------------|-----------------|-----------------|
|             | 10 <sup>2</sup> | 10 <sup>4</sup> | 10 <sup>5</sup> | 10 <sup>6</sup> |
| CE          | 3.11            | 2.97            | 2.92            | 2.87            |
| BN-HBP15/CE | 3.04            | 3.01            | 2.99            | 2.98            |
| BN-HBP20/CE | 3.13            | 3.09            | 3.07            | 3.05            |
| BN-HBP25/CE | 3.34            | 3.30            | 3.28            | 3.27            |
| BN-HBP32/CE | 3.36            | 3.32            | 3.30            | 3.29            |
| BN-HBP35/CE | 3.39            | 3.36            | 3.34            | 3.33            |
